# Supplementary material for: A multinational listeriosis outbreak and the importance of sharing genomic data
Source: PubMed Central journal article supplement — Lancet Microbe. Author manuscript; Available in PMC 2024 Mar 27. (PMC10966468; doi:10.1016/s2666-5247(20)30122-1), 2020-10-07

# THE LANCET Microbe

## Supplementary appendix

This appendix formed part of the original submission. We post it as supplied by the authors.

Supplement to: Pettengill J B, Markell A, Conrad A, et al. A multinational listeriosis outbreak and the importance of sharing genomic data. *Lancet Microbe* 2020; **1**: e233–34.

## Appendix

Figure: Timelines showing the differences in a) the date when isolate sequence data was uploaded to the National Center for Biotechnology Information (NCBI) Pathogen Detection (PD) database and b) the actual date of isolate collection. The first of the year or month were used when only year or year and month were provided for collection date, respectively. Year markers denote the middle of the year (eg, all 2020 isolates are before the 2020 year marker as they were uploaded to the database before July 1, 2020).

a)

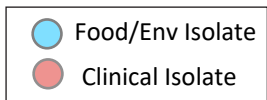

Upload Date

Appearance of food  
type of interest

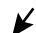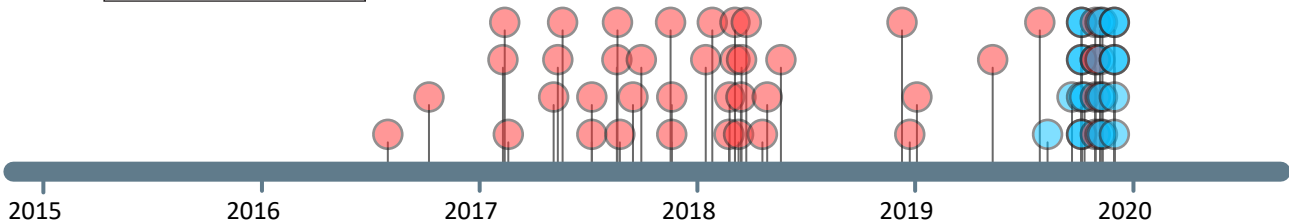

b)

Collection Date

Appearance of food  
type of interest

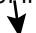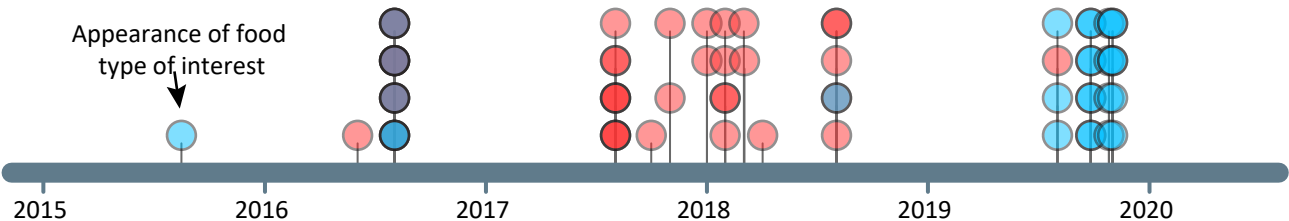

Supplement: NIHMS1975653-supplement-figure.pdf [file NIHMS1975653-supplement-figure.pdf]
